# Supplementary figures and images for: Rhoptry kinase protein 39 (ROP39) is a novel factor that recruits host mitochondria to the parasitophorous vacuole of Toxoplasma gondii
Source: Oxford University Press journal article supplement (doi:10.1242/bio.058988), 2021-09-15

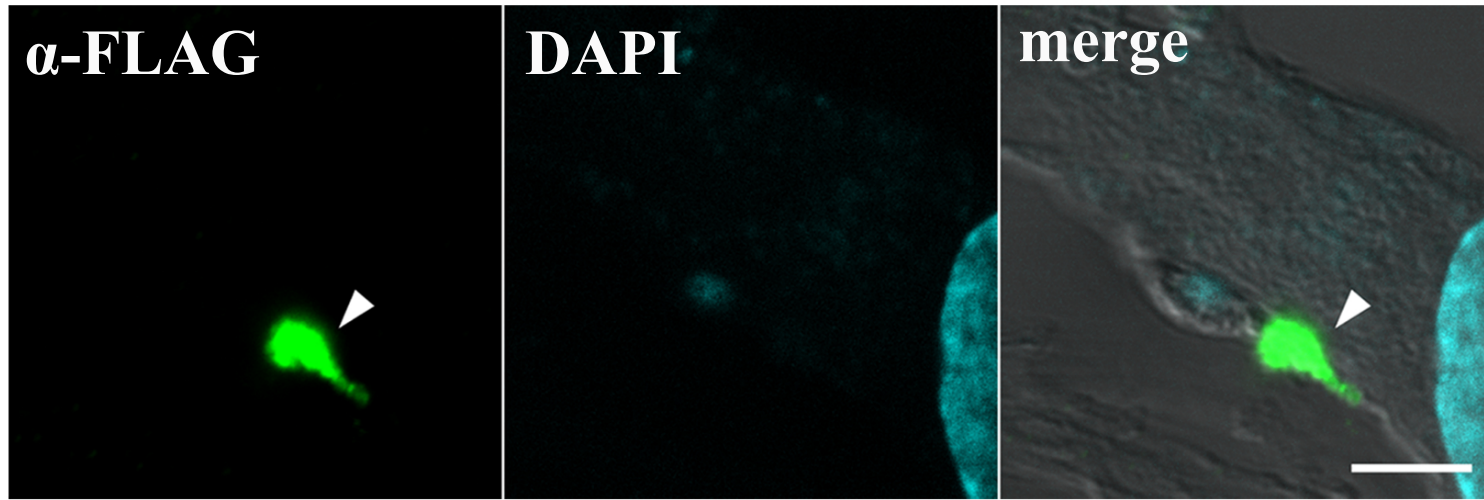

**Fig. S1.**

**A**

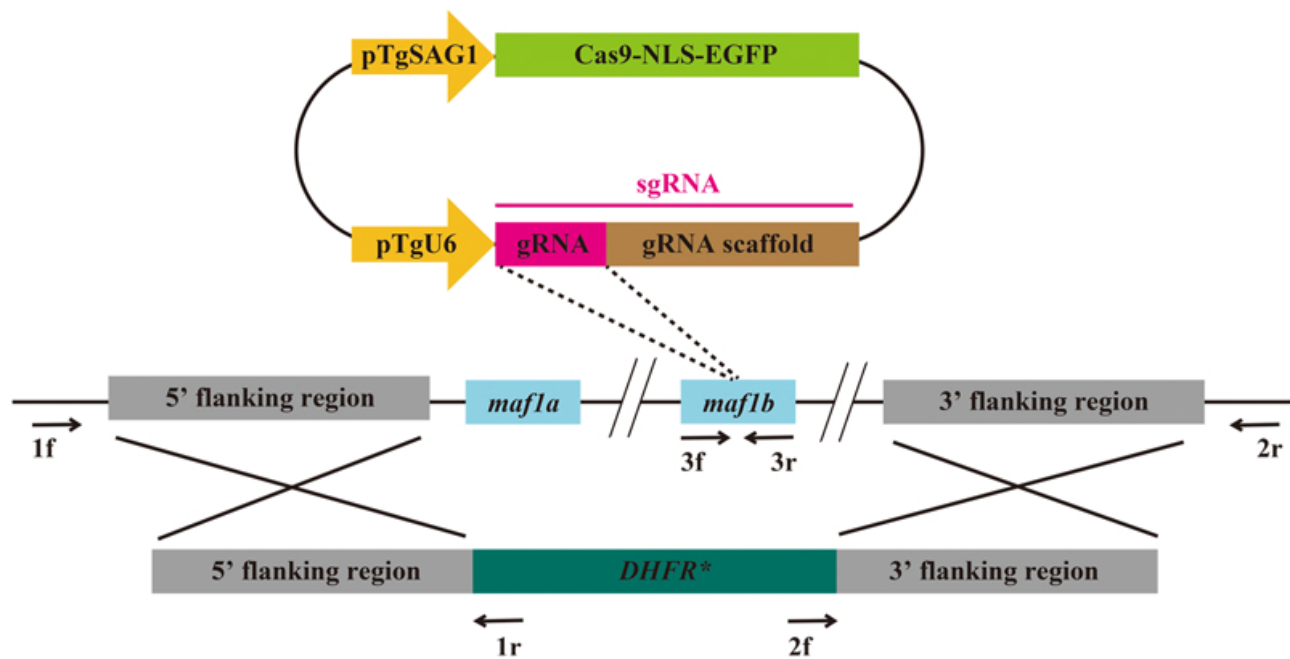

**B**

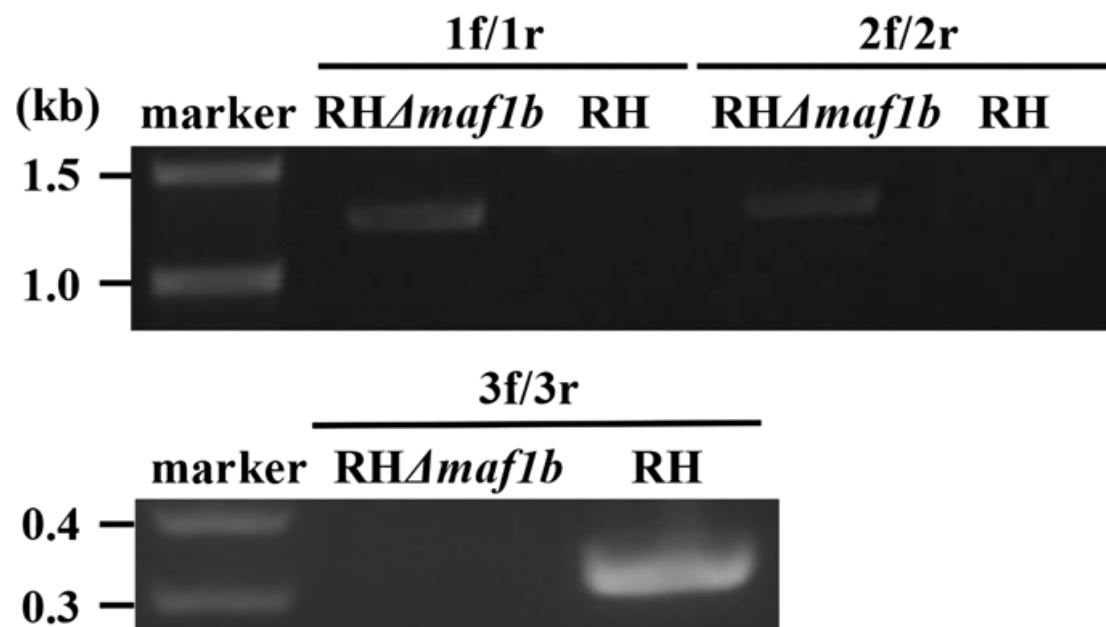

Fig. S2.

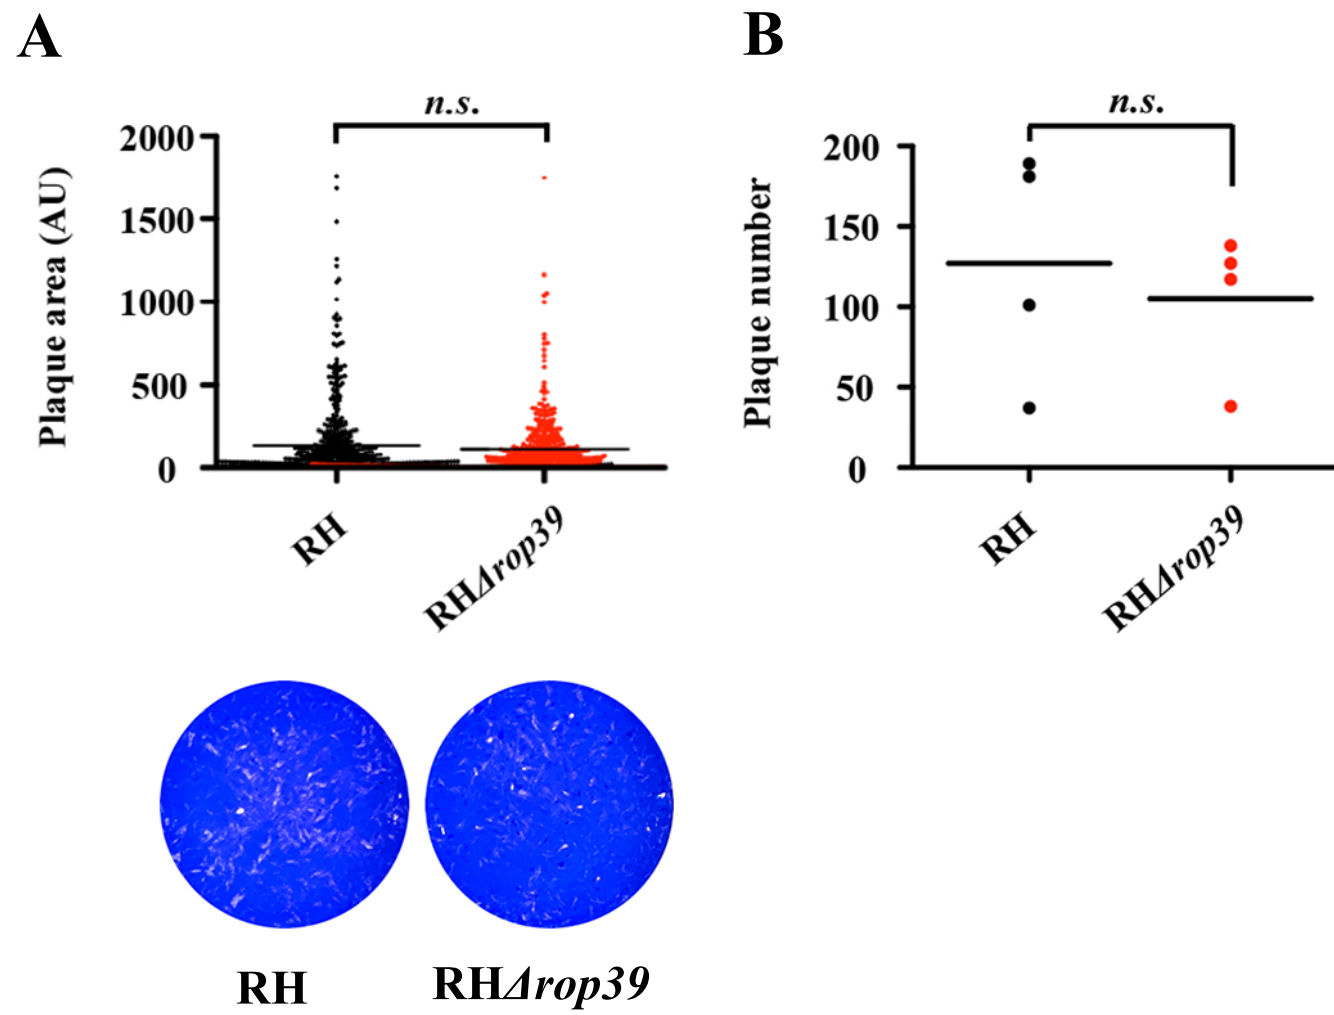

Fig. S3.

Supplement: bio058988supp.pdf [file bio058988supp.pdf]
